# Supplementary material for: The Anatomy of a Scientific Rumor
Source: PubMed Central journal article supplement — Sci Rep. 2013 Oct 18;3:2980. doi: 10.1038/srep02980 (PMC3798885; doi:10.1038/srep02980), 2013-10-18
Supplement: srep02980-s1.pdf [file srep02980-s1.pdf]

# The Anatomy of a Scientific Rumor Supplementary Information

M. De Domenico,<sup>1</sup> A. Lima,<sup>1</sup> P. Mougél,<sup>1,2</sup> and M. Musolesi<sup>1</sup>

<sup>1</sup>*School of Computer Science, University of Birmingham, United Kingdom*

<sup>2</sup>*Université de Lyon, INSA-Lyon, Villeurbanne, France*

## Statistics about the Dataset

In this document we provide supplementary information about some statistics about the dataset used in the paper.

| Twitter username | # Retweets |
|------------------|------------|
| @CERN            | 21858      |
| @ColinEberhardt  | 7144       |
| @ProfBrianCox    | 7032       |
| @newschemist     | 7031       |
| @BadAstronomer   | 3392       |
| @PiadasNerds     | 2558       |
| @muyinteresante  | 2551       |
| @NatureNews      | 2337       |
| @tomscott        | 2277       |
| @guardianscience | 2210       |
| @neiltyson       | 2071       |
| @el_pais         | 2050       |
| @cuneytozdemir   | 2024       |
| @publico_es      | 1962       |
| @maruschown      | 1955       |
| @daraobriain     | 1869       |
| @HAL9000_        | 1823       |
| @microsiervos    | 1794       |
| @johanknorberg   | 1781       |
| @cnbrk           | 1727       |
| @sciam           | 1470       |
| @CMSEXperiment   | 1389       |
| @enrique_ganem   | 1312       |
| @gobiernospa     | 1211       |
| @aberron         | 1193       |
| @mashable        | 1164       |
| @RobDenBleyker   | 1161       |
| @AngryBirds      | 1159       |
| @verge           | 1152       |
| @NatGeo          | 1106       |
| @BBCWorld        | 1065       |
| @jim68000        | 1050       |
| @Queen_UK        | 1031       |
| @materia_ciencia | 1027       |
| @michiokaku      | 1021       |
| @moedetrina      | 1010       |
| @wired           | 996        |
| @ChrisEvans      | 992        |
| @BreakingNews    | 942        |
| @BBCBreaking     | 933        |
| @Dios_Padre      | 928        |
| @BillBailey      | 923        |
| @shanselman      | 907        |
| @warblefly       | 869        |
| @jovemnerd       | 860        |
| @DaniMateoAgain  | 844        |
| @SofiaSisniega   | 842        |
| @Markgatiss      | 838        |
| @TheScienceGuy   | 832        |
| @elbaronrojo     | 824        |

TABLE I: Top 50 most retweeted authors of tweets satisfying our selection criteria.

| Country             | # Users | Status    |
|---------------------|---------|-----------|
| Austria             | 118     | Member    |
| Belgium             | 152     | Member    |
| Bulgaria            | 53      | Member    |
| Czech Republic      | 194     | Member    |
| Denmark             | 74      | Member    |
| Finland             | 106     | Member    |
| France              | 878     | Member    |
| Germany             | 1282    | Member    |
| Greece              | 110     | Member    |
| Hungary             | 56      | Member    |
| Italy               | 1387    | Member    |
| Netherlands         | 173     | Member    |
| Poland              | 231     | Member    |
| Norway              | 84      | Member    |
| Portugal            | 124     | Member    |
| Slovak Republic     | 58      | Member    |
| Spain               | 347     | Member    |
| Sweden              | 86      | Member    |
| Switzerland         | 380     | Member    |
| United Kingdom      | 799     | Member    |
| Romania             | 89      | Candidate |
| Israel              | 67      | Associate |
| Serbia              | 29      | Associate |
| India               | 149     | Observer  |
| Japan               | 230     | Observer  |
| Russia              | 858     | Observer  |
| Turkey              | 95      | Observer  |
| USA                 | 1788    | Observer  |
| Argentina           | 20      | NMS CoA   |
| Armenia             | 15      | NMS CoA   |
| Australia           | 33      | NMS CoA   |
| Azerbaijan          | 2       | NMS CoA   |
| Belarus             | 21      | NMS CoA   |
| Brazil              | 105     | NMS CoA   |
| Canada              | 160     | NMS CoA   |
| Chile               | 6       | NMS CoA   |
| China               | 117     | NMS CoA   |
| Colombia            | 9       | NMS CoA   |
| Croatia             | 22      | NMS CoA   |
| Cyprus              | 9       | NMS CoA   |
| Egypt               | 10      | NMS CoA   |
| Estonia             | 17      | NMS CoA   |
| Georgia             | 12      | NMS CoA   |
| Iceland             | 1       | NMS CoA   |
| Iran                | 21      | NMS CoA   |
| Korea (Republic of) | 96      | NMS CoA   |
| Lithuania           | 13      | NMS CoA   |
| Malta               | 1       | NMS CoA   |
| Mexico              | 45      | NMS CoA   |
| Montenegro          | 1       | NMS CoA   |
| Morocco             | 5       | NMS CoA   |
| New Zealand         | 9       | NMS CoA   |
| Pakistan            | 20      | NMS CoA   |
| Peru                | 2       | NMS CoA   |
| Saudi Arabia        | 3       | NMS CoA   |
| Slovenia            | 36      | NMS CoA   |
| South Africa        | 25      | NMS CoA   |
| TFYROM              | 2       | NMS CoA   |
| Ukraine             | 21      | NMS CoA   |
| China (Taipei)      | 70      | NMS SC    |
| Cuba                | 3       | NMS SC    |
| Ireland             | 9       | NMS SC    |
| Lebanon             | 1       | NMS SC    |
| Qatar               | 1       | NMS SC    |
| Thailand            | 5       | NMS SC    |
| Tunisia             | 1       | NMS SC    |
| Uzbekistan          | 1       | NMS SC    |

TABLE II: Number of researchers per country involved in the LHC experiments in September 2012. NMS CoA means Non-Member States with Cooperation Agreements. NMS SC means Non-Member States with Scientific Contacts with CERN. See <http://international-relations.web.cern.ch/International-Relations/office/listcountries.html>

| # RT | Username       | Text                                                                                                                                                                                                              |
|------|----------------|-------------------------------------------------------------------------------------------------------------------------------------------------------------------------------------------------------------------|
| 7141 | ColinEberhardt | Possibly the biggest scientific discovery of our time, the #Higgs Boson, announced in glorious MS Comic Sans Font <a href="http://t.co/jDxLkqNx">http://t.co/jDxLkqNx</a>                                         |
| 4504 | CERN           | #CMS: "we have observed a new boson with a mass of $125.3 \pm 0.6$ GeV at 4.9 sigma significance." Thunderous applause. #Higgs #ICHEP2012                                                                         |
| 2507 | CERN           | CERN Press Release: CERN experiments observe particle consistent with long-sought #Higgs boson <a href="http://t.co/MBjIwytL">http://t.co/MBjIwytL</a> #ICHEP2012                                                 |
| 2062 | tomscott       | At the end of the #higgs announcement, one of the CERN team will pause, nonchalantly say "oh, one more thing", then calmly teleport away.                                                                         |
| 2033 | ProfBrianCox   | Not only have taxpayers spent more on banks than we've spent on science since Jesus. Bob Diamond is keeping the Higgs out of the headlines!                                                                       |
| 2024 | cuneytozdemir  | İsviçreli Cern'de Tanrı parçacığını bulmaya çalışıyor , biz ise Çamlıca'ya dev bir TOKİ camii yaparak Tanrının bizi bulmasını umuyoruz!                                                                           |
| 1893 | publico.es     | El bosón de Higgs ("la partícula de Dios") en 9 claves <a href="http://t.co/QbcdJMvO">http://t.co/QbcdJMvO</a>                                                                                                    |
| 1781 | johanknorberg  | Reminder: Higgs is an atheist, and Lederman named it "the goddamn particle", but embarrassed publisher changed it to "God particle".                                                                              |
| 1678 | PiadasNerds    | Corinthians campeão, boson de Higgs encontrado e Megaupload voltando... Quem foi que reuniu as 7 esferas do dragão?                                                                                               |
| 1598 | CERN           | CERN's Director Rolf Heuer: "This historic milestone is only the beginning, it has global implications for the future". Standing ovation!                                                                         |
| 1515 | darao briain   | Great. Found the Higgs Boson, lost Robin Van Persie. The universe balances itself out yet again.                                                                                                                  |
| 1407 | maruschow      | Turned down opportunity to go on 1-hour radio programme to discuss the religious significance of the Higgs particle since there isn't any.                                                                        |
| 1259 | ProfBrianCox   | In simple language, CMS have discovered a new boson, and it behaves like the Standard Model Higgs                                                                                                                 |
| 1179 | CERN           | Want to understand better what was shown at #CERN today on the search for the #Higgs boson? Non-specialists check: <a href="http://t.co/IOCQCpTD">http://t.co/IOCQCpTD</a>                                        |
| 1169 | neiltyson      | The Higgs discovery makes me feel heavier already. What we need instead is the anti-Higgs. A particle that takes mass away.                                                                                       |
| 1139 | AngryBirds     | ATTN scientists: Avian intelligence reveals that the particle you're searching for is #thepiggsboson: <a href="http://t.co/bcMvzW2h">http://t.co/bcMvzW2h</a> #CERN #Higgs                                        |
| 1086 | BadAstronomer  | I've got 99.9999% problems, but a Higgs ain't one.                                                                                                                                                                |
| 1050 | jim68000       | OK, so they've announced the Higgs Boson, but no word on pricing or whether it will ship by Christmas. #fail                                                                                                      |
| 1036 | el_pais        | Hallada "la más sólida evidencia" de la existencia del bosón de #Higgs en el #CERN <a href="http://t.co/98xr5alq">@elpais_sociedad</a>                                                                            |
| 1014 | gobierno espa  | Por el descubrimiento del Bosón de Higgs la UE dará 300.000 EURO a cada científico JAJAJAJAJAJA si no saben ni darle 2 patadas a un balón hombre.                                                                 |
| 992  | ChrisEvans     | it's kinda crazy how excited i am about the higgs boson particle. what an exciting time!! i bet CERN is like a rock concert right now!!                                                                           |
| 990  | NatGeo         | Higgs boson confirmed with 99% certainty: <a href="http://t.co/97Bzfh9e">http://t.co/97Bzfh9e</a> #CERN                                                                                                           |
| 943  | RobDenBleyker  | Just explained the Higgs boson to my friend even tho I don't understand it. He was very convinced. I bet this is how religions get started.                                                                       |
| 923  | BillBailey     | The Higgs Boson has been living quietly in Guildford for some time now.                                                                                                                                           |
| 914  | CERN           | Don't miss the #Higgs update tomorrow 9:00 CEST <a href="http://t.co/kJxgUdBb">http://t.co/kJxgUdBb</a> with live tweets & blogs using hashtag #ICHEP2012 <a href="http://t.co/bk7qiGm5">http://t.co/bk7qiGm5</a> |
| 902  | neiltyson      | But seriously, congrats to CERN on the Higgs discovery. Another particle in the pocket. Another forded frontier of Nature.                                                                                        |
| 892  | CERN           | Trends so full of science right now. Awesome. #higgs #cern #ichep2012 and of course comic sans. <a href="http://t.co/COhIwzGp">http://t.co/COhIwzGp</a> via @TwitPic                                              |
| 885  | cnnbrk         | Scientists say they're closer to proving existence of Higgs boson or "God particle." <a href="http://t.co/okycJstu">http://t.co/okycJstu</a>                                                                      |
| 881  | CERN           | The recording of this morning's #Higgs press conference is now online: <a href="http://t.co/CWxO38po">http://t.co/CWxO38po</a> Seminar recording available soon. #ICHEP2012                                       |
| 877  | CERN           | Less than 1 hour to go until the #Higgs seminar @CERN. Room already full. Follow the live webcast from 9:00 CEST via <a href="http://t.co/QUEUm3XaB">http://t.co/QUEUm3XaB</a>                                    |
| 869  | warblefly      | Higgs boson walks into church. Priest says "Sorry but we don't allow particles in here." Boson says "But without me, how can you have mass?"                                                                      |
| 842  | SofiaSisniega  | DEMOCRACY IN MEXICO IS A FRAUD #EPNNuncaSeraMiPresidente Happy 4th of July Higgs #SorianaGate ACTA <a href="http://t.co/pMrnBSIh">http://t.co/pMrnBSIh</a>                                                        |
| 842  | cnnbrk         | Scientists almost certain they have proven existence of #Higgs boson. <a href="http://t.co/QdYtplJb">http://t.co/QdYtplJb</a>                                                                                     |
| 838  | Markgatiss     | Ok. The Higgs has been found and science will never be the same again. Can we PLEASE now have a Moonbase?                                                                                                         |
| 832  | TheScienceGuy  | The Higgs is real !?! The results are good to 5 standard deviations. Yikes. Whoa. Wow. This could change the world...                                                                                             |
| 821  | CERN           | Are we close to discovering the #Higgs Boson? <a href="http://t.co/gqmwKF0c">http://t.co/gqmwKF0c</a> Find out at 9:00 CEST tomorrow via <a href="http://t.co/QUEUm3XaB">http://t.co/QUEUm3XaB</a> #ICHEP2012     |
| 818  | sickpediabot   | Higgs Boson goes into a Catholic church. The priest says, "You're not welcome here." Higgs Boson says "You can't have mass without me."                                                                           |
| 794  | CERN           | #ATLAS combined results give a local significance of 5 sigma at 126.5 GeV. Audience goes wild. "I'm not done yet, there's more" says Fabiola                                                                      |

TABLE III: Most retweeted tweets satisfying our selection criteria.
